# Supplementary material for: Polyethylene Glycol Plus Linaclotide is an Effective Bowel Preparation Regimen for Patients with Bristol Stool Scale 1-2: a Randomized Controlled Trial
Source: Research Square preprint supplement (doi:10.21203/rs.3.rs-896828/v1), 2021-09-23
Supplement: Supplementary file 1 [file 657282057c50eb13e0895eb1.docx]

| **Additional file 3:**  **Table S3. Outcomes of colonoscopy (per-protocol analysis)** | | | | | | | | |
| --- | --- | --- | --- | --- | --- | --- | --- | --- |
|  |  | Group A (n=102) | Group B (n=104) | Group C (n=102) | *P*-value | *P*AB | *P*AC | *P*BC |
| Withdrawal time (min) |  | 5.9 ± 1.5 | 5.8 ± 2.2 | 5.4 ± 2.4 | 0.927 |  |  |  |
| Polyp detection rate (PDR) |  | 16(15.7%) | 34(32.7%) | 37(36.3%) | 0.002 | 0.004 | 0.001 | 0.463 |
| Size of polyp | <5mm | 13(12.7%) | 22(21.2%) | 26(25.4%) | 0.067 |  |  |  |
|  | >5mm | 9(8.8%) | 18(17.3%) | 16(15.7%) | 0.177 |  |  |  |
| Location of polyp | Rectosigmoid | 9(8.8%) | 26(25.0%) | 34(33.3%) | 0.000 | 0.002 | 0.000 | 0.188 |
| Mid colon | 6(5.9%) | 13(12.5%) | 8(7.8%) | 0.225 |  |  |  |
| Right colon | 5(4.9%) | 7(6.7%) | 10(9.8%) | 0.389 |  |  |  |
| Other colonoscopic findings | Colitis | 6(5.9%) | 7(6.7%) | 2(2.0%) |  |  |  |  |
| Diverticula | 3(2.9%) | 3(2.9%) | 0 |  |  |  |  |
| IBD | 0 | 0 | 7(6.9%) |  |  |  |  |
| Values are mean ± SD, % or number.  *P*AB, *P*-value for separate item comparing group A with B; *P*AC, *P*-value for separate item comparing group A with C; *P*BC, *P*-value for separate item comparing group B with C. | | | | | | | | |
